# Supplementary material
Source: MDPI journal article supplement (https://www.mdpi.com/2071-1050/14/9/5323)
Supplement: s1 [file s1]

Archive with 3 entries (3 files):
- File S1_Documentation_StakeholderWorkshops_Pune.pdf
- Table S1_First SH mapping.xlsx
- Table S2_Workshop Participants.xlsx
