# Supplementary material
Source: MDPI journal article supplement (https://www.mdpi.com/2071-1050/14/9/5323)
Supplement: s1 [file s1 › Table S1_First SH mapping.xlsx]

## Sheet: SH mapping
Nexus Focus	Polit-/-admin. level	Name SH	Type of SH GO - Gov. Organisation	Short Discription	Level of interest	Level of influence	Users or Experts	Workshop partcipation	Contact/Website
Water	Maharashtra	Water Resource Department (WRD)	GO		1	2	E	yes	wrd.maharashtra.gov.in
Water	Pune	Water Supply and Pumping Department	GO	Department of PMC	1	2	E	yes	https://pmc.gov.in/en/water
Urban	India	Central Public Health and Environmental Engineering Organization (CPHEEO)	GO		0	?	e	no
Urban	India	Jana Urban Space Foundation (Jana USP)	NGO		0	?	e	no	www.jusp.org
Urban	India	Town and Country Planning Organisation (TCPO)	GO		0	?	e	no
Water	Maharashtra	Maharashtra Industrial Development Corporation (MIDC)	GO	Water allocation for industry, generally industrial dev. of PC and ind. corridor	2	2	E	yes	https://www.midcindia.org
Water	India	Watershed Organisation Trust (WOTR)	NGO	Headquarter in Pune; WOTR is based in Pune but works only in rural water problems to my knowledge. They can be helpful in getting connected to farmers and rural domestic water users. can represent users	2	2	E and U	yes	https://www.wotr.org/
Urban	Pune	Shelter Associates	NGO	most prominent NGO in PUne for informal settlements, focus on sanitation and slum mapping	2	2	u	yes	http://shelter-associates.org/index.php
Food & Ag	Maharashtra	Maharashtra State Co-Operative Sugar Factories Federation (MSCSFF)	industry		2	2	u		http://www.mahasugarfed.org/default.aspx
Energy	Maharashtra	TATA Power	private sector		2	2	e	yes	www.tatapower.com
Water	Maharashtra	Maharashtra Krishna Valley Development Cooperation (MKVDC)	GO		1	2	E	yes	https://wrd.maharashtra.gov.in/portal/portal/MKVDC/aboutus
Water	Maharashtra	Maharashtra Water Resource Regulatory Authority (WRRA)	GO		1	2	E	yes	http://mwrra.org/
Water	Pune	Pimpri-Chinchwad Municipal Corporation (PCMC)	GO	the twin city of Pune, which forms Pune Metropolis with Pune, has a separate municipal corporation and also different water sources	1	2	E	yes	https://www.pcmcindia.gov.in/index.php
Water	Pune	Pune metropolitan regional development authority (PMRDA)	GO	this is a very young agency, established just few years ago, to develop peri-urban areas. This agency is supposed to take over the responsibility to supply water to peri-urban areas in the future	1	2	E	yes	http://www.pmrda.gov.in/index.html
Water	Pune	Pune Municipal Corporation (PMC)	GO		1	2	E	yes	https://pmc.gov.in/en
Water	India	Tata Hydropower	Company	headoffice Mumbai, Check if Hydropower or umbrelly company Tata Power is more relevant	1	2	E	yes	www.tatapower.com
Urban	Maharashtra	Pune Metropolitan Regional Development Authority (PMRDA)	GO	founded in 2015 by state gov. of Maharashtra, oversees peri-urban development of pune and pimpri chinchwad (uniform development plans etc), including 100 villages in the surroundings	1	2	e	rather yes
Food & Ag	Maharashtra	Department of Agriculture, Government of Maharashtra	GO		1	2	e	yes	http://krishi.maharashtra.gov.in, Subhash Katkar. Shri Sachindra Pratap Singh, IAS Commissioner, Agriculture District Superintending Agricultural Officer, Pune
Energy	Pune	PMC Electrical Department	GO	department concerned with the municipality's power issues (not distribution). e.g. street lighting, energy efficiency campaigns etc. Especially interesting: 'Pune Maximum Solar City', part of Smart City Mission, a smart city has at least 10% of electricity generated by renewables. With this guidance at the backdrop, Pune has planned to overachieve this target for the Local Area Development of Aun…	1	2	e	maybe	https://pmc.gov.in/en/electrical https://pmc.gov.in/en/pune-maximum-solar-city
Energy	Maharashtra	Prayas	NGO	headquarter in Pune; high-quality publications, expertise on energy and water issues, also involvved in policy discussions -->Top priority for SLL	1	2	e (u)	yes	Shantanu Dixit: Group Coordinator, Prayas (Energy Group); http://www.prayaspune.org/
Water	India	Central Water And Power Research Station	GO	located in Pune --> check if anyone works explicitly on Maharashtra, only then relevant	0	2	E	yes	http://cwprs.gov.in/
Water	India	National Water Academy (NWA)	GO	located in Pune; --> check if anyone works explicitly on Maharashtra, only then relevant	0	2			nwa.mah.nic.in
Water	India	National Water Development Agency	GO	check, if anyone works explicitly on Maharashtra, only then relevant	0	2	E	yes	http://nwda.gov.in/content/
Urban	Pune	PMC Additional Municipal Commissioners	GO	second highest position in PMC executive branch: The Ass. Mun. Comm., 'Special' and 'Estate' relevant for us: special: city planning, incl. water etc. estate: land aqkuisition, encroachment control, slum upgrading etc.	0	2	e	yes
Urban	Pune	PMC Department of Building Development	GO	urban planning	0	2	e		https://pmc.gov.in/en/building-permission?bpd
Urban	Pune	PMC Slum Rehabilitation Authority	GO	PMC's department for rehabilitation of all decleared / undecleared slum around Pune and Pimpri - Chinchwad	0	2	e	maybe	https://pmc.gov.in/en/slum; srapune@yahoo.in
Urban	Pune	Pune Smart City Development Cooperation Limited	GO	in charge of Pune's Smart City Mission; special purpose vehicle, owned 50/50 by the state and the municipal corporation. Activities: slum upgrading efforts (small scale), the provision of more public toilets and the 24*7 water supply program, which aims at future-proofing the water supply of the city; GIS mapping of the city’s water network	0	2	e	yes	https://punesmartcity.in
Energy	Maharashtra	Maharashtra Electricity Regulatory Commission (MERC)	GO	regulatory		2	e	yes	http://www.mercindia.org.in/
Energy	Maharashtra	Maharashtra Energy Development Agency (MEDA)	GO	regulatory		2	e	yes	https://www.mahaurja.com/meda/
Energy	Maharashtra	Maharashtra State Electricity Distribution Company (MSEDCL - "Mahadiscom/Mahavitaran"	GO	distribution		2	e	yes	http://www.mahadiscom.in/
Energy	Maharashtra	Maharashtra State Load Despatch Centre (MAHASLDC)	GO	transmission, grid stability, 'open access' facilitation. Sub-organization of Mahatransco, mandate for load balancing, is the organization administrating (un)planned electricity blackouts		2	e	maybe	https://mahasldc.in/
Energy	Maharashtra	Maharashtra State Power Generation Company (MSPGCL - "Mahagenco")	GO	generation		2	e	yes	https://www.mahagenco.in/
Water	India	Advanced Center for Water Resources Development and Management (ACWADAM)	academia	located in Pune, concrete projects on groundwater management, would probably be interested	2	1	E	maybe	http://www.acwadam.org/
Urban	Maharashtra	MASHAL (Maharashtra Social Housing and Action League)	NGO	Slum mapping and upgrading in Pune	2	1	e	?	http://mashal.org.in/
Food & Ag	Maharashtra	Action for Agricultural Renewal in Maharashtra (AFARM)	NGO	AFARM was born out of an acute need for an Apex Institution to co-ordinate efforts of Non Government Organizations (NGOs) in their tasks of providing Drinking Water and Agricultural Extension services to villages in drought affected Maharashtra. It was one of the first organizations to operate as an Apex institution, in the country.	2	1	u	yes	2/23 A-B Raisoni Park, Market Yard, Pune 411 037, Maharashtra, India. Phone – (020) 24264641, 24268302 Fax – (020) 24266303 Email – admin@afarm.org http://afarm.org/
Food & Ag	Pune	MAHA Farmers Producer Company Ltd. (MAHAFPC) Maharashtra	Farmers producer organisations	To bring reforms in the agrarian condition of the small and marginal farmers, SFAC, Ministry of Agriculture Govt. India, have taken a national level Initiative, and the movement started initially in Maharashtra. Maharashtra is promoting small Farmers Producer organization legalizing in Farmers Producer companies.	2	1	u	yes	http://sfacindia.com/PDFs/MAHAFarmers-Producer-Company-Ltd%28MAHAFPC%29.pdf
Food & Ag	Maharashtra	MOFF, Maharashtra Organic Farming Foundation	Association	MOFF is a state level confederation of 120 NGOs & 1,42,000 individual farmers, thinkers, scientists, activists & experts from Maharashtra State (India) covering 307690 Sq. km. area & about 100 million population. MOFF has been active in promoting Sustainable Agriculture Technology mainly for small land holder farmers & creating awareness for poison-free food consumption in Urban Society. Today af…	2	1	u	yes	www.moffindia.org
Water	Pune	MANTHAN	research and social development society, non-governmental	Manthan Adhyayan Kendra is a centre set up to research, analyse and monitor water and energy issues from the perspective of just, equitable and sustainable development. Manthan was set up in 2001 at Badwani (M.P.) The activities of Manthan. including analysis and advocacy are now being run from two locations, Badwani and Pune. There are four broad components of Manthan’s work. Overall monitoring …	1	1	E and U	maybe	Phone: (91) – 9527995607 (Pune), Email: manthan.kendra@gmail.com, manthan.shripad@gmail.com, jindadost@gmail.com, Website: www.manthan-india.org
Urban	Pune	100 Resilient Cities	NGO	International city network founded by Rockefeller Foundation. Pune (and Amman) selected, funding for Resilience STrategy and -Officer received	1	1	e	maybe	http://www.100resilientcities.org/cities/pune; Mr. Mahesh Harhare, Chief Resilience Officer Pune
Urban	Pune	Bharati Vidyapeeth University, Institute of Environment Education and Research	academia	Research partners Kraas/Butsch in Pune, experience in urban sust. studies and e.g. urbna expansion	1	1	e		http://ieer.bharatividyapeeth.edu/; Lakshmi N. Kantakumar: PhD on Pune urban expansion model
Urban	India	NSDF (National Slum Dweller Federation	NGO	The National Slum Dwellers Federation (NSDF) was founded in the mid 1970s and is a national organization of community groups and leaders who live in slums/informal settlements across India. Its main aim is to mobilize the urban poor to come together, articulate their concerns and find solutions to the problems they face. Today the NSDF works with about half a million households in the country. Cl…	1	1	e/u
Urban	Pune	PMC Ward Offices	GO	lowest admin level, information on neighborhood developments and challenges	1	1	1	maybe
Urban	India	SPARC (Society for the Promotion of Area Resource Centers)	NGO	The Society for the Promotion of Area Resource Centers (SPARC) is one of the largest Indian NGOs working on housing and infrastructure issues for the urban poor. In 1984, when SPARC was formed, it began working with the most vulnerable and invisible of Mumbai's urban poor - the pavement dwellers. SPARC's philosophy is that if we can develop solutions that work for the poorest and most marginalize…	1	1	e/u
Energy	Pune	ICLEI South Asia	NGO	Global NGO for urban sustainability. Selected in 2017 as consultant for Pune's Solar City programme (http://southasia.iclei.org/newsdetails/article/iclei-south-asia-offers-consultancy-to-future-solar-city-pune.html). Contact to Shardul A. Venegurkar, currently located in Nagpur	1	1	u, e	maybe	http://southasia.iclei.org/
Water	India	Central Ground Water Board (CGWB)	GO		0	1		maybe	http://cgwb.gov.in
Water	India	Central Water Commission (CWC)	GO		0	1		maybe	http://cwc.gov.in/
Water	India	Ministry of Water Resources, River Development & Ganga Rejuvenation	GO	The Ministry of Water Resources is responsible for laying down policy guidelines and programmes for the development and regulation of country's water resources. Overall planning for the development of Ground Water Resources, establishment of utilizable resources and formulation of policies for exploitation, overseeing of and support to State level activities in ground water development.	0	1		no	http://mowr.gov.in/
Water	India	National Water Mission	GO		0	1		no	http://nwm.gov.in/
Urban	India	Ministry of urban development	GO		0	1	e	no
Water	Maharashtra	Water Users' Associations	users' association	Karin, ask Gokhale	2	0		yes	Find some information here: http://wua.aquiferindia.org/
Urban	Pune	Magarpatta City	corporate	largest township in Pune, example of new trend towards gated communities for the better-off. autarky in terms of water, energy and waste!	2	0	e/u	yes	http://www.magarpattacity.com/
Food & Ag	Pune	Gorus, organic farmers association		Gorus started in Feb 2008 as an informal ‘collective’ of organic farmers and consumers, who came together in an effort to grow organic food in partnership with consumers, so that farmers could receive a fair price for their produce throughout the year, and consumers could participate in farming and receive organically grown food at a reasonable price. In August 2013. Gorus trains small farmers in…	2	0	u	rather yes	www.gorus in Gorus Organic Farming Association, 1st Flr, Durga, 92/2, Gangote Path, Oppsite Kamla Nehru Park, Erandwane, Pune 411 004 Maharashtra, INDIA. Telephone : 020-25673324 Email : feedback@gorus.in
Urban	Pune	KagadKach Patra Kashtakari Panchayat (KKPKP)	association/interest group	local trade union of waste pickers	1	0	u	no
Urban	Pune	Wagholi Housing Residents Association (WHSA)	NGO, Nachbarschaftshilfe	We Are a�?Wagholi Housing Societies Association (WHSA)a�?, formed in the wake of popular sentiment coming from residents of housing societies with solitary motto of a�?Making Wagholi a better place to livea�?, better coordination between authorities and residents and encourage office accountability	1	0	u	no	http://www.wagholihsa.org
Water	Maharashtra	Godavari Marathwada Irrigation Development Corporation	GO	no relevance for Upper Bhima Basin	0	0		no
Water	Maharashtra	Konkan Irrigation Development Corporation	GO	no relevance for Upper Bhima Basin	0	0		no
Water	Maharashtra	Tapi Irrigation Development Corporation	GO	no relevance for Upper Bhima Basin	0	0		no
Water	Maharashtra	Vidarbha Irrigation Development Corporation	GO	no relevance for Upper Bhima Basin	0	0		no
Urban	Pune	Centre for Development Studies and Activi- ties (CDSA)	academia	postgraduate and research institute pioneering urban planning, micro finance, poverty alleviation, and sustainable growth and development	0	0	e	no	http://www.cdsaindia.org/page2/page2.html
Food & Ag	Pune	Urban user groups		who and how much affected by tanker? who knows what?	2
Water	Maharashtra	2030 WaterResourceGroup (2030 WRG)	public, private, civil society partnership hosted by World Bank Group	world bank group, one focus area Maharashtra, Maharashtra Program Lead, Mahesh Patankar			E		https://www.2030wrg.org/maharashtra/
Water	India	American Water Works Association India (AWWAindia)	NGO	located in Mumbai					http://awwaindia.com/default.aspx
Water	Pune	association of private water tankers (?)		carify relevance of tanker with Gokhale, WOTR
Water	Pune	Department of Environmental Science (Savitribai Phule Pune University)	Academia	The focus of the Department has been on teaching and research, dealing with Environmental Issues important for the conservation of Natural Resources, Geohazards, Environmental Degradation and Biodiversity studies. The Teachers and Students of this Department have undertaken research activities in the areas of Life Sciences, Earth Sciences, Chemical Sciences, Atmospheric Sciences and Engineering. …					http://www.unipune.ac.in/dept/science/environmental_science; hodenvsci@unipune.ac.in; evsoffice@unipune.ac.in
Water	India	Directorate of Irrigation Research and Development, Pune	GO	This organization is located in Pune, however the website does not work and hardly any other information can be found					dird-pune.gov.in
Water	Maharashtra	Groundwater Surveys and Development Agency	GO	The G.S.D.A. is engaged, in the exploration, development and augmentation of groundwater resources in the State through various schemes. This mainly includes, drilling of bore wells/tube wells under Rural Water Supply Programme, rendering technical guidance under minor irrigation programme by locating suitable dug well sites, strengthening of groundwater sources by water conservation measures, ar…					https://gsda.maharashtra.gov.in/english/index.php/About_us
Water	India	Krishna Water Disputes Tribunal	GO	decides on Inter-state water allocation			E		http://mowr.gov.in/acts-tribunals/current-inter-state-river-water-disputes-tribunals/krishna-river-water-dispute-tribunal
Water	Maharashtra	Lokabhimukh Pani Dhoran Sangharsh Manch (People Oriented Water Policy Struggle Platform)	NGO	interview to get more information			U
Water	Maharashtra	Maharashtra Pollution Control Board	GO	more information needed					http://mpcb.gov.in/
Water	Maharashtra	Project Level Water Users' Association (PLWUA)	users' association	Karin, ask Gokhale
Water	India	South Asia Network on Dams, Rivers and People (SANDRP)	NGO	experts on Indian water issues, nationally relevant, also importance in Maharashtra			E		https://sandrp.in/about-us/about-sandrp/
Water	Maharashtra	State Water Board	GO	more information needed on relevance!
Water	Maharashtra	State Water Council and Board		more information needed. Probably they are mostly tribunales
Water	Maharashtra	StateWater Council	GO	more information needed on relevance!
Water	Maharashtra	Water and Land Management Institute (WALMI)	GO	Vision: To develop centre of excellence in training, research and consultancy services for improving Irrigation Water Management through capacity building and human resources development. Mission: To make water resources project sustainable and competitive through human resources development and capacity building of irrigation managers and stakeholders to meet future demand by improved technologi…					http://www.walmi.org
Water	Maharashtra	Water and Sanitation Support Organisation	GO	more information needed					https://www.wsso.in/
Water	Maharashtra	Water Conservation Department	GO	more information needed					https://waterconserve.maharashtra.gov.in/default.aspx
Water	Maharashtra	Water Supply and Sanitation Department (Maharashtra Jeevan Pradhikara - MJP) Zila Parishad (=District Council)	GO	To my [Ju Young] knowledge, the MJP built the rural water supply schemes, but the ZPs for different regions was handed over the operation of the schemes and rural water supply. During the Pune trip, I’ve met with MJP and they said that they would collect my requested data regarding rural water supply to the corresponding ZPs. relevance?					https://water.maharashtra.gov.in/default.aspx; https://mjp.maharashtra.gov.in/en
Urban	Pune	Baner-Pashan Link Road Vikas Samiti (BPLRVS)	Civil Society	BPLRVS ist eine Nachbarschaftsvereinigung (Samiti = Association/Ausschuss), die sich soweit aus Artikeln ersichtlich aufgrund der jahrelangen Verzögerung des Baus der namensgebenden Straße und den damit verbundenen Probleme gegründet hat http://www.sakaltimes.com/pune/residents-irked-incomplete-work-link-road-15842. Verbindungen zu Water issues finden sich in dem bereits zuvor zitierten Artikel h…
Urban	Pune	Centre for Environment Education (CEE)	Civil Society	The DP Coalition, a network of organizations and individuals in Pune with a secretariat at Centre for Environment Education, seeks to enrich the planning process by bringing in external expertise and inputs from stakeholder consultations. In addition, it aims to undertake outreach efforts to publicize options and tradeoffs. The underlying aim of this initiative is to use the opportunity of the De…
Food & Ag	Maharashtra	BAIF Development Research Foundation	NGO	BAIF's Mission is to create opportunities of gainful self-employment for the rural families, especially disadvantaged sections, ensuring sustainable livelihood, enriched environment, improved quality of life and good human values. This is being achieved through development research, effective use of local resources, extension of appropriate technologies and upgradation of skills and capabilities …				no	http://www.baif.org.in/ BAIF Bhavan, Dr. Manibhai Desai Nagar Warje, Pune 411058, India Phone : 91-20-25231661 / 64700175 Fax : 91-20-25231662 E-mail : baif@baif.org.in
Food & Ag	Pune	College of Agriculture and Allied Sciences, Baramati						no	http://www.agricollegebaramati.in/index.aspx
Food & Ag	Pune	Commissionerate of Agriculture in Pune						?
Food & Ag	Pune	Gomukh Environmental Trust for Sustainable Development Pune	research, NGO	Gomukh is a Trust in Pune working in the field of Watershed Conservation & Development. The work undertaken in this area includes Planning, Research and actual Project. It aims at taking up the soil and water conservation at local level so as to solve the problem of drinking water and irrigation fo the crops. https://www.bothends.org/en/Cooperation/Partner-organisations/Gomukh-Environmental-Trust…					www.gomukh.org
Food & Ag	Pune	Krishi Vigyan Kendra Baramati (Pune - district level Farm Science Center)		The aim of Krishi Vigyan Kendra is to reduce the time lag between generation of technology at the research institutions and it's transfer to the farmer's field for increasing production, productivity and income from the agriculture and allied sectors on a sustained basis.				no	http://www.kvkbaramati.com/about.aspx
Food & Ag	India	Ministry of Agirculture & Farmers Welfare	GO	making rules and acts, info for farmers, statistics etc., give seed licenses				no	http://agricoop.nic.in/
Food & Ag	India	Nirankar Balgram	NGO	OBJECTIVES: To Provide basic facilities to children. To Provide qualitative education and vocational Trainings for beneficiaries. To Organizing various Programs for children To do rehabilitation of beneficiaries. To provide children with healthy and hygienic shelter. To provide children the scope for physical development through nutritious food, sports, and games					http://www.nirankarbalgram.org located in PUne
Food & Ag	India	People's Archive of Rural India (PARI)	NGO/Project	An initiative doing amazing work documenting farmer issues across the country. Again, a key knowledge and stakeholder resource for local contexts. The initiative is led by P Sainath, one of India's most famous and critically-acclaimed journalists and writers who writes widely on FWE issues, among others. It might be worthwhile to connect with him as an expert on the topic.				no	https://ruralindiaonline.org
Food & Ag	Maharashtra	Sugar Factories	industry	Ines asks Ju Young for contacts			u		ask MSCSFF for contact
Food & Ag	Maharashtra	Vasantdada Sugar Institute	research/industry	research institute that is funded by sugarcane farmers and factories to work on various aspects to promote the sugar industry				no	http://www.vsisugar.com/
Food & Ag	Pune	Vasundhara Swacchta Abhiyan (VSA)	Civil Society	Das Motto ist „Volunteering for a Sustainable Future“: “Vasundhara Swachata Abhiyan is involved in various initiatives including prevention of farmer suicides, bringing toxin-free fruits and vegetables to consumers, groundwater conservation, river conservation, and so on.” Der Fokus liegt auf den ersten Blick auf Farmers.					https://www.facebook.com/VSAorg; vasorg.in
Food & Ag	Pune	Water User Associations (WUAs)
Energy	India	Central Electricity Authority (CEA)	GO	regulatory				1	cea.nic.in
Energy	India	Central Electricity Regulatory Commission (CERC)						1	http://www.cercind.gov.in/
Energy	India	find lists of all organisations under MoP here: https://powermin.nic.in/en/content/organisations-under-mop-0
Energy	Maharashtra	Maharashtra State Electricity Transmission Company (MSETCL - "Mahatransco")	GO	transmission			e	maybe	http://www.mahatransco.in/
Energy	Maharashtra	Maharshtra State Electricity Board (MSEB) Holding Company	GO	strategy				no	http://msebindia.com/
Energy	India	Ministry of Power						1	https://powermin.nic.in/
Energy	Pune	Nexus Energy-Tech Pvt Ltd	Industry	We envision a Greener Earth. We will keep striving to provide faster, high quality and hi tech services to our client-partners. Our knowledge sharing would help clients in comprehending the idea of benefits and profits of Renewable energy.					http://nexusenergy.in
Energy	Maharashtra	Ratnagiri Pvt. Ltd.	private sector power producer	The gas power plant commissioned by Enron is operated by Ratnagiri Pvt. Ltd. today and is still among the largest power plants in the state				no	http://www.ratnagiriimpex.com (?)
Energy	Pune	Small Business (Restaurant, Garage...)		important user group for all dimensions, contact through Gokhale?
Energy	India	World Renewal Spiritual Trust	NGO	The World Renewal Spiritual Trust (WRST) is a registered charity and recognised solar research centre with headquarters in Mumbay and branches all over India. The Trust promots and carries out research in the ancient Indian Culture, Yoga and Philosophies. There fore the Trust teaches ethics and values and reaches out to all levels of society. In order to pursue its aims, the WRST works in close l…					http://www.wrst.in
Diverse	Pune	Aundh-Baner Balewadi Pashan Vikas Manch (ABBP Viaks Manch)	Civil Society	umbrella organization of various citizens’ groups
Diverse	Pune	Climate Collective Pune (CCP)	Civil Society						http://www.climatecollectivepune.org/
Diverse	Maharashtra	Comprehensive Rural Health Project, Jamkhed (CRHP)	NGO and research	CRHP has become an organization that empowers people and communities to eliminate injustices through integrated efforts in health and development. CRHP works by mobilizing and building the capacity of communities to achieve access to comprehensive development and freedom from stigma, poverty, and disease. Pioneering a comprehensive approach to community-based primary healthcare (also known as the…					info@jamkhed.org, www.jamkhed.org,
Diverse	Pune	Confederation of Indian Industry	Industry						https://www.cii.in/States.aspx?enc=5WcSaM0yzEfRFlFUNeIvYGPI9xL9HypQH+qrcmYEmb5AiJloBVkxerCgn7p5lokpLPlM2Gbp69Fg549uwn3k/g==
Diverse	Pune	Gokhale Institute	Academia						http://www.gipe.ac.in/
Diverse	India	Janaagraha Centre for Citizenship and Democracy	NGO	Janaagraha Centre for Citizenship and Democracy (Janaagraha) is a Bengaluru based not-for-profit institution that is a part of theJana group. Janaagraha’s mission is to transform quality of life in India’s cities and towns. It defines quality of life as comprising quality of infrastructure and services and quality of citizenship. To achieve its mission, Janaagraha works with citizens to catalyse …				no
Diverse	Pune	Manual Labourers’ Association	association/interest group	Pune; unions of informal workers (street vendors, waste pickers, domestic workers, head-loaders, auto-rickshaw and tempo drivers, and construction workers) form a city-wide Manual Labourers’ Association				no	https://library.fes.de/pdf-files/ipg/2011-2/08_a_bonner.pdf; p.93
Diverse	Pune	Parisar	NGO	Parisar is an NGO working in the field of environmental awareness, education and action since its formation in the early 1980s. Its area of interest spreads across a wide range of subjects from nature conservation to sustainable development, in fact everything that affects our ability to live on the earth- the air, the water, the quality of land- all that which contributes to our healthy planet a…				no	http://www.parisar.org/
Diverse	Maharashtra	Rural Development Department Maharashtra	GO					no	http://reuraldev.maharashtra.gov.in/english/dcmNew/index.php
Diverse	Pune	Sajag Nagrik Manch	NGO	Several news paper articles can be found where SNM comments critically on PMC's policiesa NGO formed for spreading awareness about RTI (Right to Information) has been conducting a meeting first Sunday of every month since last 8 years. Various issues related to RTI and good governance are discussed in these meetings. It was an uninterrupted successful venture because of alert and enthusiastic Pun…			U	maybe	https://www.facebook.com/sajagnagrikmanch
Diverse	Pune	SATHI (Support for Advocacy and Training to Health Initiatives)	NGO	SATHI is the action-centre of Anusadhan Trust with headquarters in Pune. The SATHI team initiated its work in 1998 as an action team in CEHAT and has now evolved into an autonomous centre. The core principles of SATHI's functioning are social relevance, democratic mode of functioning, ethical conduct and social accountability. SATHI works on health rights issues, through partnerships with civil s…					http://sathicehat.org/ Plot No.140, Flat No. 3 & 4, Aman E Terrace, Dahanukar Colony, Kothrud, Pune – 411029 Phone No. +91 20 25473565 / 25472325 / 094223285780 / 09168917788 ​ Fax No. +91 20 25472325 Email – sathicehat@gmail.com
Diverse	Pune	Seva Sahayog Foundation	NGO	Aiming towards the betterment of the environment our programs focuses on greener future, sanitation, waste management and cleanliness.				no	http://sevasahayog.org/#aboutus
Diverse	Pune	Society for Promoting Participative Ecosystem Managing (SOPPECOM)	NGO	located in Pune; see authors of IWMI-TATA Report (2012)				no	https://www.soppecom.org
Diverse	India	The Indian Institute of Human Settlements (IIHS)	Accademia	They do a lot of work on FWE nexus in urban as well as in rural settings, and to my knowledge have worked in Pune and in other areas of Maharashtra before. They are based in Bangalore, but can be a key knowledge resource for localized contexts of the FWE nexus in urban and rural India. They also run an urban studies fellowship - maybe you can explore some tie-ups there?				no
