# Supplementary material
Source: MDPI journal article supplement (https://www.mdpi.com/2071-1050/14/9/5323)
Supplement: s1 [file s1 › Table S2_Workshop Participants.xlsx]

## Sheet: Resource Users
Nexus Category	Type	Institution Name	Website	Short Description of Organization	Workshop Participant	m/f/*
FOOD	NGO	Action for Agricultural Renewal in Maharashtra (AFARM)	https://www.afarm.org/	An Association of Civil Society Organizations engaged in the field of Rural Development in Maharashtra State in India; AFARM was born out of an acute need for an Apex Institution to co-ordinate efforts of Non Government Organizations (NGOs) in their tasks of providing Drinking Water and Agricultural Extension services to villages in drought affected Maharashtra. It was one of the first organizati…	Vijay Vyas	m
WATER	Private	AECOM	https://www.aecom.com/in/	interdisciplinary team of engineers, designers, planners and program and construction managers has been successfully executing major projects in the country across various sectors, such as urban development, transportation, environment, masterplanning and energy efficient building engineering.	Dhananjay Pandit	m
FOOD	NGO/Research	Appropriate Rural Technology Institute (ARTI)	http://www.arti-india.org	The primary objective of ARTI is to develop, standardise, popularise & commercialise innovative rural technologies aimed at improving the quality of life and standard of living of the rural inhabitants of India.	Mahesh Sudhakar Siddheshwar	m
URBAN	Civil Society	Aundh Gaon Urban Village		farmers producing sugar cane; self organised	Ganesh Kalapure	m
URBAN	Civil Society	Aundh Gaon Urban Village		farmers producing sugar cane; self organised	Tapan Kamble	m
ENVIRONMENT	NGO/Research	Center for Environment Education (CEE)	https://www.ceeindia.org/maharashtra.php	Centre for Environment Education (CEE) was established in August 1984 as a Centre of Excellence supported by the Ministry of Environment and Forests, Government of India. CEE, a national institution with its headquarters in Ahmedabad, has a mandate to promote environmental awareness nationwide.	Amar Karan	m
ENVIRONMENT	NGO/Research	Center for Environment Education (CEE)	https://www.ceeindia.org/maharashtra.php	Centre for Environment Education (CEE) was established in August 1984 as a Centre of Excellence supported by the Ministry of Environment and Forests, Government of India. CEE, a national institution with its headquarters in Ahmedabad, has a mandate to promote environmental awareness nationwide.	Avinash Madhale	m
FOOD	Association	Confederation of Indian Horticulture	no website	a statutory body recently established by the Union agricultural ministry	Sopan Kanchan	m
FOOD		Farmers		farmers group, self organised, sell at markets	Manisha Gawade	f
FOOD		Farmers		farmers group, self organised, sell at markets	Pradeep Kaduskar	m
NA	Academia	Gokhale Institute of Politics and Economics (GIPE)	http://gipe.ac.in/	Gokhale Institute of Politics and Economics, Pune, established in 1930 by the Servants of India Society, is the oldest research and training institute in Economics in the country. It is dedicated to research into the socio-economic dimensions of the Indian society, and carries forward the legacy of Gopal Krishna Gokhale who founded the Servants of India Society in 1905 with a view to promote educ…	Dr. Parsharam Patil	m
NA	Academia	Gokhale Institute of Politics and Economics (GIPE)	http://gipe.ac.in/	Gokhale Institute of Politics and Economics, Pune, established in 1930 by the Servants of India Society, is the oldest research and training institute in Economics in the country. It is dedicated to research into the socio-economic dimensions of the Indian society, and carries forward the legacy of Gopal Krishna Gokhale who founded the Servants of India Society in 1905 with a view to promote educ…	Bushana Karandikar	f
URBAN	NGO	Habitat Forum	http://www.inhaf.org	Vision: Socially just, economically productive, culturally vibrant, politically participatory, environmentally sustainable, technologically advanced and receptive cities and settlements. Mission: Promotion and strengthening of civil society/ NGO role in shaping the vision through selective partnership with the governments and national and international organizations.	Neeta Chalke	f
WATER	NGO	Jeevitnadi Living River Foundation	https://www.jeevitnadi.org/	Group that wants a clean/pollution-free river and is mobilizing NGO's and others in this cause	Shailaja Deshpande	f
URBAN	Citizen Association	Loni Kalbhor		Loni Kalbhor is a village 11 kilometres east of the City of Pune	Bharat Sawant	m
URBAN	Citizen Association	Loni Kalbhor		Loni Kalbhor is a village 11 kilometres east of the City of Pune	Ganesh Salunke	m
URBAN	Citizen Association	Loni Kalbhor		Loni Kalbhor is a village 11 kilometres east of the City of Pune	Ganesh Kalapure	m
URBAN	NGO	Maharashtra Social Housing and Action League (MASHAL)	http://mashal.org.in/	MASHAL, a non- governmental organization was conceived in the year 1985, by a group of like-minded people who believe in community development through people’s participation and recognize adequate shelter and a healthy living environment with access to services as a basic human right.	Sharad Mahajan	m
WATER	Civil Society	Mission Groundwater	no website	a city-based NGO working to improve the city’s groundwater	Ravindra Sinha	m
WATER; FOOD	Civil Society	Pani Panchayat Movement		Pani Panchayat is a voluntary activity of a group of farmers engaged in the collective management (harvesting and distribution) of surface water and groundwater (wells and percolation tanks). ...	Kalpanatai Salunkhe	m
URBAN	Citizen Association	Pimparkhed		Pimparkhed is a Village in Shirur Taluka in Pune	Sandeep Shelke	m
URBAN	Citizen Association	Pimparkhed		Pimparkhed is a Village in Shirur Taluka in Pune	Sanjay Gavshete	m
SOCIAL	NGO	Rachana Foundation Trust	http://rachanafoundation.in/	Rachana Foundation Trust, born March 1st 2017 has taken its baby steps to involve in various social activities and through innovative means work towards a better society and in particular take concerted steps towards helping students, teachers and women to improve the culture and Kannada awareness and development.	Shripad Konde Desmukh	m
SOCIAL	NGO	Rachana Foundation Trust	http://rachanafoundation.in/	Rachana Foundation Trust, born March 1st 2017 has taken its baby steps to involve in various social activities and through innovative means work towards a better society and in particular take concerted steps towards helping students, teachers and women to improve the culture and Kannada awareness and development.	Pournima Agargar	f
SOCIAL	NGO	Rachana Foundation Trust	http://rachanafoundation.in/	Rachana Foundation Trust, born March 1st 2017 has taken its baby steps to involve in various social activities and through innovative means work towards a better society and in particular take concerted steps towards helping students, teachers and women to improve the culture and Kannada awareness and development.	Harshil R.	m
ENERGY	Private	Selco	http://www.selco-india.com	SELCO is a rural energy service company, with its headquarters in Bangalore, Karnataka, India. Established in 1995, to disprove the following 'myths' and over the last 20 years	Mayur Sarode	m
WATER	Non-profit company	Shashwat Eco Solution Foundation	http://shashwatecosolution.org/	Non profit that aims to improve rainwater harvesting and promote sustainable development and to maintain the balance of the ecosystem and the civilization.	Pradnya Thakur	f
FOOD	Citizen Association	Vasundhara Swachata Abhiyan	https://www.vsaorg.in/	a public movement to mitigate global warming and to support farmers for a sustainable future	Deepak Shrote	m
FOOD	NA	no affiliation documented		Farmer	Ashok Modhave,	m
FOOD	NA	no affiliation documented		Farmer	Rushikesh Tambosekar	m

## Sheet: Experts & Policy
Nexus Category	Type	Institution Name	Website	Short Description of Organization	Workshop Participant	m/f/*
URBAN	NGO	100 Resilient Cities, Rockefeller Foundation	http://www.100resilientcities.org/cities/pune	The Rockefeller Foundation (100RC) is dedicated to helping cities around the world become more resilient by providing resources for a resiliency officer, a strategy and network of member cities and ngos	Mahesh Harhare	m
WATER	Public, private, civil society partnership	2030 Water Resource Group	https://www.2030wrg.org/maharashtra/	The 2030 Water Resources Group (2030 WRG) is a public, private, civil society partnership hosted by the World Bank Group. The 2030 WRG aims to contribute to the United Nations’ SDGs of ending extreme poverty; growing strong, inclusive, and transformative economies; and protecting our ecosystems. The 2030 WRG works with partners to develop analytics that build on existing water information; conven…	Anjali Parasnis	f
WATER, FOOD	NGO/Research	Advanced Center for Water Resources Development and Management (ACWADAM)	http://www.acwadam.org/	A not-for-profit organisation that aims at establishing a groundwater management agenda in India; stitution that works on aquifer-based groundwater management	Manoj Bhagwat	m
WATER, FOOD	NGO/Research	Advanced Center for Water Resources Development and Management (ACWADAM)	http://www.acwadam.org/	A not-for-profit organisation that aims at establishing a groundwater management agenda in India; stitution that works on aquifer-based groundwater management	Uma Aslekar	f
URBAN	Research	Centre for Development Studies and Activities (CDSA)	http://www.cdsaindia.org	CDSA is a pioneering institution in contextual, convergent urban, rural and regional sustainable development planning registered as non-profit Trust and Society under the relevant Acts of 1860 and 1950 respectively in India. CDSA conducts research on development problems and processes, teaches and trains participants about them and helps governments and other, its agencies and other public bodies…	Anneta Benninger	f
ENVIRONMENT	NGO	Ecological Society of India	no website	College & University	Gurudas Nulkar	m
ENVIRONMENT	NGO	Gomukh Environmental Trust for Sustainable Development	http://www.gomukh.org/ (doesn't work)	Gomukh Trust came into existence as a response and reaction to the inadequate and lopsided approach of the Government's watershed development programme. Gomukh Trust's vision is to create a society where natural resources and ecosystems are restored and the poor can lead a self-sufficient and dignified life. Gomukh regards facilitating social mobilisation along with the use of appropriate technol…	Vijay Paranjpye	m
WATER	Government	Groundwater Surveys and Development Agency (GSDA)	https://gsda.maharashtra.gov.in/	The G.S.D.A. is engaged, in the exploration, development and augmentation of groundwater resources in the State through various schemes. This mainly includes, drilling of bore wells/tube wells under Rural Water Supply Programme, rendering technical guidance under minor irrigation programme by locating suitable dug well sites, strengthening of groundwater sources by water conservation measures, ar…	Shekhar Gaikwad	m
WATER	Government	Groundwater Surveys and Development Agency (GSDA)	https://gsda.maharashtra.gov.in/	The G.S.D.A. is engaged, in the exploration, development and augmentation of groundwater resources in the State through various schemes. This mainly includes, drilling of bore wells/tube wells under Rural Water Supply Programme, rendering technical guidance under minor irrigation programme by locating suitable dug well sites, strengthening of groundwater sources by water conservation measures, ar…	Vijay Pankhmode	m
WATER	Government	Groundwater Surveys and Development Agency (GSDA)	https://gsda.maharashtra.gov.in/	The G.S.D.A. is engaged, in the exploration, development and augmentation of groundwater resources in the State through various schemes. This mainly includes, drilling of bore wells/tube wells under Rural Water Supply Programme, rendering technical guidance under minor irrigation programme by locating suitable dug well sites, strengthening of groundwater sources by water conservation measures, ar…	Bhagyashri Maggirwar	m
WATER	Government	Groundwater Surveys and Development Agency (GSDA)	https://gsda.maharashtra.gov.in/	The G.S.D.A. is engaged, in the exploration, development and augmentation of groundwater resources in the State through various schemes. This mainly includes, drilling of bore wells/tube wells under Rural Water Supply Programme, rendering technical guidance under minor irrigation programme by locating suitable dug well sites, strengthening of groundwater sources by water conservation measures, ar…	Ajaykumar Kadam	m
ENERGY	Government	Maharashtra Electricity Regulatory Commission (MERC)	https://www.merc.gov.in/ http://www.mercindia.org.in/	Established to create regulation, permits and provide annual report	V.P.Raja	m
URBAN	Government	Maharashtra Industrial Development Corporation (MIDC)	https://www.midcindia.org/	Established by Gov of Maharashtra to set up industrial areas	Rajendra Gavade	m
ENERGY	Government	Maharashtra State Electricity Distribution Company (MSEDCL)	http://www.mahadiscom.in/	Generation, Transmission & Distribution of Electricity in the State of Maharashtra barring Mumbai. Restructured into 4 companies, each focusing on one aspect; Mahavitran serves 41928 villages / 457 towns	Sachin Talewar	m
WATER	Government	Maharashtra Water Resource Regulatory Authority (MWRRA)	http://mwrra.org/	Vision Statement "To be proactive, professional and trustworthy water resource regulator" Mission Statement "Our mission is to provide sustainable water security to the State of Maharashtra"	Suresh Kulkarni	m
	Private	Mahrattra Chamber of Commerce, Industries and Agriculture (MCCIA)	https://www.mcciapune.com/	Vision: We at MCCIA aim to transform lives and establish an eco- friendly, bio-diverse environment that will nurture and propel towards creation of infrastructure and education while emerging as the nucleus of technical and industrial research, development and growth model of the country. We will strive to encourage preservation of heritage, energize lives, inspire progress, optimize resources an…	Prasad Shukla	m
ENERGY	Private	Nexus Energy TECH	http://nexusenergy.in	strategic consultancy for those wanting to invest in the solar energy sector. This includes help in product development, manufacturing and setting up the organization.	Arvind Karandikar	m
SOCIAL; ENERGY	NGO	Prayas Energy Group	http://www.prayaspune.org/	PRAYAS (Initiatives in Health, Energy, Learning and Parenthood) is a non-governmental, non-profit organization based in Pune, India. Members of Prayas are professionals working to protect and promote public interest in general and the interests of disadvantaged sections of society in particular.	Shweta Kulkarni	f
URBAN	Government	Pune Municipal Commission (PMC)	https://www.pmc.gov.in/	The Pune Municipal Corporation strives to consistently provide citizen centric information, services and platforms to enhance the city’s performance and quality of life.	Mangesh Dighe	m
	Academia	University of Pune	http://www.unipune.ac.in		Purva Gadpallu	f
FOOD	Private/Research	Vasantdada Sugar Institute (VSI)	https://www.vsisugar.com/	Established in the year 1975 by the sugarcane grower members of cooperative sugar factories in the State of Maharashtra, it is the only organisation of its kind in the world. The Institute performs, under one umbrella, all scientific technical and educational functions relevant to the sugar industry. The Institute strives for an all round progress of the sugar industry and to achieve this objecti…	Shivajirao Deshmukh	m
FOOD	Private/Research	Vasantdada Sugar Institute (VSI)	https://www.vsisugar.com/	Established in the year 1975 by the sugarcane grower members of cooperative sugar factories in the State of Maharashtra, it is the only organisation of its kind in the world. The Institute performs, under one umbrella, all scientific technical and educational functions relevant to the sugar industry. The Institute strives for an all round progress of the sugar industry and to achieve this objecti…	P.P.Shinde	m
WATER	Government	Vasundhara Watershed Development Agency	https://mahaiwmp.org/appellate_authority		Hermant Vasekar	m
WATER, FOOD	Government	Water and Land Management Institute (WALMI)	http://www.walmi.org	Part of Ministry of Soil and Water Conservation that aims to provide training, research and consultancy to farmers and irrigation agencies	Pradeep Purandare	m
WATER	Government	Water Resource Department (WRD) Maharashtra	https://wrd.maharashtra.gov.in/	The Water Resources Department (formerly known as Irrigation Department); ne of the key institutional reform initiatives of the state is reconstructing of the existing Irrigation Development Corporation’s into River Basin Agency’s with a view to strengthen the states capacity in multi sector planning and management of water resources at river basin level.	Hiralal Mendhegiri	m
WATER	Government	Water Resource Department (WRD) Maharashtra	https://wrd.maharashtra.gov.in/	The Water Resources Department (formerly known as Irrigation Department); ne of the key institutional reform initiatives of the state is reconstructing of the existing Irrigation Development Corporation’s into River Basin Agency’s with a view to strengthen the states capacity in multi sector planning and management of water resources at river basin level.	Yashavantrao K. Bhadane	m
WATER	Government	Water Resource Department (WRD) Maharashtra	https://wrd.maharashtra.gov.in/	The Water Resources Department (formerly known as Irrigation Department); ne of the key institutional reform initiatives of the state is reconstructing of the existing Irrigation Development Corporation’s into River Basin Agency’s with a view to strengthen the states capacity in multi sector planning and management of water resources at river basin level.	Rajendra Dhodapkar	m
WATER	Government	Water Resource Department (WRD) Maharashtra	https://wrd.maharashtra.gov.in/	The Water Resources Department (formerly known as Irrigation Department); ne of the key institutional reform initiatives of the state is reconstructing of the existing Irrigation Development Corporation’s into River Basin Agency’s with a view to strengthen the states capacity in multi sector planning and management of water resources at river basin level.	Upsurni Ravindra	m
WATER	Government	Water Resource Department (WRD) Maharashtra	https://wrd.maharashtra.gov.in/	The Water Resources Department (formerly known as Irrigation Department); ne of the key institutional reform initiatives of the state is reconstructing of the existing Irrigation Development Corporation’s into River Basin Agency’s with a view to strengthen the states capacity in multi sector planning and management of water resources at river basin level.	Vilas Rajput	m
WATER	Government	Water Resource Department (WRD) Maharashtra	https://wrd.maharashtra.gov.in/	The Water Resources Department (formerly known as Irrigation Department); ne of the key institutional reform initiatives of the state is reconstructing of the existing Irrigation Development Corporation’s into River Basin Agency’s with a view to strengthen the states capacity in multi sector planning and management of water resources at river basin level.	D. R. More	m
WATER	Government	Water Resource Department (WRD) Maharashtra	https://wrd.maharashtra.gov.in/	The Water Resources Department (formerly known as Irrigation Department); ne of the key institutional reform initiatives of the state is reconstructing of the existing Irrigation Development Corporation’s into River Basin Agency’s with a view to strengthen the states capacity in multi sector planning and management of water resources at river basin level.	Kamesh S. Patil	m
WATER	Government	Water Resource Department (WRD) Maharashtra	https://wrd.maharashtra.gov.in/	The Water Resources Department (formerly known as Irrigation Department); ne of the key institutional reform initiatives of the state is reconstructing of the existing Irrigation Development Corporation’s into River Basin Agency’s with a view to strengthen the states capacity in multi sector planning and management of water resources at river basin level.	Yogesh Sawant	m
WATER	Government	Water Resource Department (WRD) Maharashtra	https://wrd.maharashtra.gov.in/	The Water Resources Department (formerly known as Irrigation Department); ne of the key institutional reform initiatives of the state is reconstructing of the existing Irrigation Development Corporation’s into River Basin Agency’s with a view to strengthen the states capacity in multi sector planning and management of water resources at river basin level.	Pravin Kolhe	m
WATER	NGO	Watershed Organisation Trust (WOTR)	https://www.wotr.org/	Watershed Organisation Trust (WOTR) is a globally recognized organization dedicated to transforming the lives of millions across India in participatory watershed development and eco-systems restoration, adaptive sustainable agriculture, integrated and efficient water management, and climate change adaptation, with a special emphasis on vulnerable communities, farmers, and women.	Marcella D’Souza	f
WATER	NGO	Watershed Organisation Trust (WOTR)	https://www.wotr.org/	Watershed Organisation Trust (WOTR) is a globally recognized organization dedicated to transforming the lives of millions across India in participatory watershed development and eco-systems restoration, adaptive sustainable agriculture, integrated and efficient water management, and climate change adaptation, with a special emphasis on vulnerable communities, farmers, and women.	Eshwar Kale	m

## Sheet: Modelers
Nexus Category	Type	Institution Name	Website	Short Description of Organization	Workshop Participant	m/f/*
WATER	Public, private, civil society partnership	2030 Water Resource Group	https://www.2030wrg.org/maharashtra/	The 2030 Water Resources Group (2030 WRG) is a public, private, civil society partnership hosted by the World Bank Group. The 2030 WRG aims to contribute to the United Nations’ SDGs of ending extreme poverty; growing strong, inclusive, and transformative economies; and protecting our ecosystems. The 2030 WRG works with partners to develop analytics that build on existing water information; conven…	Priyanka Shendage	f
ENVIRONMENT, SOCIAL	NGO	Adarsh Foundation	http://www.adarshfoundation.org	Foundation which aims to build a civilized society through-literacy, knowledge, ability and equality.	Johnson Fernandez	m
ENVIRONMENT, SOCIAL	NGO	Adarsh Foundation	http://www.adarshfoundation.org	Foundation which aims to build a civilized society through-literacy, knowledge, ability and equality.	Vishnu Khedkar	m
WATER, FOOD	NGO/Research	Advanced Center for Water Resources Development and Management (ACWADAM)	http://www.acwadam.org/	A not-for-profit organisation that aims at establishing a groundwater management agenda in India; stitution that works on aquifer-based groundwater management	Manoj Bhagwat	m
ENVIRONMENT	NGO/Research	Center for Environment Education (CEE)	https://www.ceeindia.org/maharashtra.php	Centre for Environment Education (CEE) was established in August 1984 as a Centre of Excellence supported by the Ministry of Environment and Forests, Government of India. CEE, a national institution with its headquarters in Ahmedabad, has a mandate to promote environmental awareness nationwide.	Sanskriti Menon	f
ENVIRONMENT	NGO	Ecological Society of India	no website	College & University	Gurudas Nulkar	m
NA	Academia	Gokhale Institute of Politics and Economics (GIPE)	http://gipe.ac.in/	Gokhale Institute of Politics and Economics, Pune, established in 1930 by the Servants of India Society, is the oldest research and training institute in Economics in the country. It is dedicated to research into the socio-economic dimensions of the Indian society, and carries forward the legacy of Gopal Krishna Gokhale who founded the Servants of India Society in 1905 with a view to promote educ…	Kakali Muhopadhyay	f
NA	Academia	Gokhale Institute of Politics and Economics (GIPE)	http://gipe.ac.in/	Gokhale Institute of Politics and Economics, Pune, established in 1930 by the Servants of India Society, is the oldest research and training institute in Economics in the country. It is dedicated to research into the socio-economic dimensions of the Indian society, and carries forward the legacy of Gopal Krishna Gokhale who founded the Servants of India Society in 1905 with a view to promote educ…	Aniruddha More	m
WATER, FOOD	Government	Water and Land Management Institute (WALMI)	http://www.walmi.org	Part of Ministry of Soil and Water Conservation that aims to provide training, research and consultancy to farmers and irrigation agencies	Pradeep Purandare	m
WATER	Government	Water Resource Department (WRD) Maharashtra	https://wrd.maharashtra.gov.in/	The Water Resources Department (formerly known as Irrigation Department); ne of the key institutional reform initiatives of the state is reconstructing of the existing Irrigation Development Corporation’s into River Basin Agency’s with a view to strengthen the states capacity in multi sector planning and management of water resources at river basin level.	Shailaja Sulakhe	f
WATER	Government	Water Resource Department (WRD) Maharashtra	https://wrd.maharashtra.gov.in/	The Water Resources Department (formerly known as Irrigation Department); ne of the key institutional reform initiatives of the state is reconstructing of the existing Irrigation Development Corporation’s into River Basin Agency’s with a view to strengthen the states capacity in multi sector planning and management of water resources at river basin level.	Sanjay Heganna	m
WATER	NGO	Watershed Organisation Trust (WOTR)	https://www.wotr.org/	Watershed Organisation Trust (WOTR) is a globally recognized organization dedicated to transforming the lives of millions across India in participatory watershed development and eco-systems restoration, adaptive sustainable agriculture, integrated and efficient water management, and climate change adaptation, with a special emphasis on vulnerable communities, farmers, and women.	Marcella D’Souza	f
WATER	NGO	Watershed Organisation Trust (WOTR)	https://www.wotr.org/	Watershed Organisation Trust (WOTR) is a globally recognized organization dedicated to transforming the lives of millions across India in participatory watershed development and eco-systems restoration, adaptive sustainable agriculture, integrated and efficient water management, and climate change adaptation, with a special emphasis on vulnerable communities, farmers, and women.	Madhav Gholkar	m
WATER	NGO	Watershed Organisation Trust (WOTR)	https://www.wotr.org/	Watershed Organisation Trust (WOTR) is a globally recognized organization dedicated to transforming the lives of millions across India in participatory watershed development and eco-systems restoration, adaptive sustainable agriculture, integrated and efficient water management, and climate change adaptation, with a special emphasis on vulnerable communities, farmers, and women.	Aditya Shinde	f
WATER	Government	Groundwater Surveys and Development Agency (GSDA)	https://gsda.maharashtra.gov.in/	The G.S.D.A. is engaged, in the exploration, development and augmentation of groundwater resources in the State through various schemes. This mainly includes, drilling of bore wells/tube wells under Rural Water Supply Programme, rendering technical guidance under minor irrigation programme by locating suitable dug well sites, strengthening of groundwater sources by water conservation measures, ar…	Ajaykumar Kadam	m

## Sheet: Validation
Nexus Category	Type	Institution Name	Website	Short Description of Organization	Workshop Participant	m/f/*	Previous Workshop Attendance
URBAN	NGO	100 Resilient Cities, Rockefeller Foundation	http://www.100resilientcities.org/cities/pune	The Rockefeller Foundation (100RC) is dedicated to helping cities around the world become more resilient by providing resources for a resiliency officer, a strategy and network of member cities and ngos	Mahesh Harhare	m	Expert
WATER	Public, private, civil society partnership	2030 Water Resource Group	https://www.2030wrg.org/maharashtra/	The 2030 Water Resources Group (2030 WRG) is a public, private, civil society partnership hosted by the World Bank Group. The 2030 WRG aims to contribute to the United Nations’ SDGs of ending extreme poverty; growing strong, inclusive, and transformative economies; and protecting our ecosystems. The 2030 WRG works with partners to develop analytics that build on existing water information; conven…	Anjali Parasnis	f	Expert
WATER, FOOD	NGO/Research	Advanced Center for Water Resources Development and Management (ACWADAM)	http://www.acwadam.org/	A not-for-profit organisation that aims at establishing a groundwater management agenda in India; stitution that works on aquifer-based groundwater management	Dr. Himanshu Kulkarni	m	no
WATER, FOOD	NGO/Research	Advanced Center for Water Resources Development and Management (ACWADAM)	http://www.acwadam.org/	A not-for-profit organisation that aims at establishing a groundwater management agenda in India; stitution that works on aquifer-based groundwater management	Manoj Bhagwat	m	Expert, Modelling
WATER, FOOD	NGO/Research	Advanced Center for Water Resources Development and Management (ACWADAM)	http://www.acwadam.org/	A not-for-profit organisation that aims at establishing a groundwater management agenda in India; stitution that works on aquifer-based groundwater management	Siddharth Patil	m	no
ENVIRONMENT	NGO/Research	Center for Environment Education (CEE)	https://www.ceeindia.org/maharashtra.php	Centre for Environment Education (CEE) was established in August 1984 as a Centre of Excellence supported by the Ministry of Environment and Forests, Government of India. CEE, a national institution with its headquarters in Ahmedabad, has a mandate to promote environmental awareness nationwide.	Avadhut Abhyankar	m	no
ENVIRONMENT	NGO/Research	Center for Environment Education (CEE)	https://www.ceeindia.org/maharashtra.php	Centre for Environment Education (CEE) was established in August 1984 as a Centre of Excellence supported by the Ministry of Environment and Forests, Government of India. CEE, a national institution with its headquarters in Ahmedabad, has a mandate to promote environmental awareness nationwide.	Mayur Ahir	m	no
ENVIRONMENT	NGO/Research	Center for Environment Education (CEE)	https://www.ceeindia.org/maharashtra.php	Centre for Environment Education (CEE) was established in August 1984 as a Centre of Excellence supported by the Ministry of Environment and Forests, Government of India. CEE, a national institution with its headquarters in Ahmedabad, has a mandate to promote environmental awareness nationwide.	Mohini Jadhav	f	no
ENVIRONMENT	NGO/Research	Center for Environment Education (CEE)	https://www.ceeindia.org/maharashtra.php	Centre for Environment Education (CEE) was established in August 1984 as a Centre of Excellence supported by the Ministry of Environment and Forests, Government of India. CEE, a national institution with its headquarters in Ahmedabad, has a mandate to promote environmental awareness nationwide.	Nitin Kale	m	no
ENVIRONMENT	NGO/Research	Center for Environment Education (CEE)	https://www.ceeindia.org/maharashtra.php	Centre for Environment Education (CEE) was established in August 1984 as a Centre of Excellence supported by the Ministry of Environment and Forests, Government of India. CEE, a national institution with its headquarters in Ahmedabad, has a mandate to promote environmental awareness nationwide.	Sanskriti Menon	f	Modelling
ENVIRONMENT	NGO	Ecological Society of India	no website	College & University	Gurudas Nulkar	m	Expert, Modelling
0	Academia	Gokhale Institute of Politics and Economics (GIPE)	http://gipe.ac.in/	Gokhale Institute of Politics and Economics, Pune, established in 1930 by the Servants of India Society, is the oldest research and training institute in Economics in the country. It is dedicated to research into the socio-economic dimensions of the Indian society, and carries forward the legacy of Gopal Krishna Gokhale who founded the Servants of India Society in 1905 with a view to promote educ…	Aniruddha More	m	Modelling
WATER	Civil Society	IA Trust	no website		Ravindra Sinha	m	Stakeholder
Environment/ Sustainability	Government/ Network	ICLEI - Local Governments for Sustainability South Asia	http://southasia.iclei.org	ICLEI – Local Governments for Sustainability is a network of more than 1,750 local and regional governments, supported by a team of global experts, driving sustainable urban development worldwide. Active in 100+ countries, we impact over 25 percent of the global urban population. ICLEI South Asia - the South Asian arm of ICLEI - Local Governments for Sustainability, aims to build and serve a regi…	Ritu Thakur	f	no
#N/A	#N/A	Jaldhara Seva Abhiyan	https://www.facebook.com/iShailendraPatel		Shailendra Patel	m	no
WATER	NGO	Jeevitnadi Living River Foundation	https://www.jeevitnadi.org/	Group that wants a clean/pollution-free river and is mobilizing NGO's and others in this cause	Shailaja Deshpande	f	Stakeholder
Energy/ Environment	Private Sector	M P EnSystems (SLL1: 2030 WRG)	https://www.mpensystems.com/	We are a niche energy and environmental sector consultancy and advisory firm that was set up in 2012. We worked with private sector clients, multilateral financial institutions, philanthropies, academia, policy making institutions and civil society organisations. Our experts have direct experiece of working with key development finance institutions. On behalf of our clients, we advise several ele…	Priyanka Shendage	f	Modelling
URBAN	NGO	Maharashtra Social Housing and Action League (MASHAL)	http://mashal.org.in/	MASHAL, a non- governmental organization was conceived in the year 1985, by a group of like-minded people who believe in community development through people’s participation and recognize adequate shelter and a healthy living environment with access to services as a basic human right.	Ishrat Sayyed	m	no
URBAN	NGO	Maharashtra Social Housing and Action League (MASHAL)	http://mashal.org.in/	MASHAL, a non- governmental organization was conceived in the year 1985, by a group of like-minded people who believe in community development through people’s participation and recognize adequate shelter and a healthy living environment with access to services as a basic human right.	Mandar Athavale	m	no
WATER	Government	Maharashtra Water Resource Regulatory Authority (MWRRA)	http://mwrra.org/	Vision Statement "To be proactive, professional and trustworthy water resource regulator" Mission Statement "Our mission is to provide sustainable water security to the State of Maharashtra"	Suresh Kulkarni	m	Expert
	Private	Mahrattra Chamber of Commerce, Industries and Agriculture (MCCIA)	https://www.mcciapune.com/	Vision: We at MCCIA aim to transform lives and establish an eco- friendly, bio-diverse environment that will nurture and propel towards creation of infrastructure and education while emerging as the nucleus of technical and industrial research, development and growth model of the country. We will strive to encourage preservation of heritage, energize lives, inspire progress, optimize resources an…	Prasad Shukla	m	Expert
WATER	#N/A	Mission Groundwater (Bhujal Abhiyan)	#N/A	#N/A	Dr. Rajhans	m	no
WATER	#N/A	Mission Groundwater (Bhujal Abhiyan)	#N/A	#N/A	Vaishali Patkar	m	no
SOCIAL	NGO	Rachana Foundation Trust	http://rachanafoundation.in/	Rachana Foundation Trust, born March 1st 2017 has taken its baby steps to involve in various social activities and through innovative means work towards a better society and in particular take concerted steps towards helping students, teachers and women to improve the culture and Kannada awareness and development.	Shripad Konde Desmukh	m	Stakeholder
WATER	Non-profit company	Shashwat Eco Solution Foundation	http://shashwatecosolution.org/	Non profit that aims to improve rainwater harvesting and promote sustainable development and to maintain the balance of the ecosystem and the civilization.	Pradnya Thakur	f	Stakeholder
ENVIRONMENT	#N/A	Sustainable Living Integrated Solutions Pvt. Ltd. AND Jeevitnadi Living River Foundation	http://www.sustainablelifestylestore.com/		Niranjan Upasani	m	no
URBAN	Research	Symbiosis Centre for Management Studies (SCMS) Pune	https://www.scmspune.ac.in/	SCMS started its journey in 2004 and what followed was a path of discovery, excitement and activities that has taken us one step ahead in our continuous quest for perfection. Devoted to excellence in teaching, learning and research at an early stage, we develop students into not only leaders but individuals with a strong vision to make an impact globally!	Dr. Navendu Chaudhary	m	no
URBAN	Research	Symbiosis Centre for Management Studies (SCMS) Pune	https://www.scmspune.ac.in/	SCMS started its journey in 2004 and what followed was a path of discovery, excitement and activities that has taken us one step ahead in our continuous quest for perfection. Devoted to excellence in teaching, learning and research at an early stage, we develop students into not only leaders but individuals with a strong vision to make an impact globally!	Jyoti Jain Tholiya	f	no
URBAN	Research	Symbiosis Centre for Management Studies (SCMS) Pune	https://www.scmspune.ac.in/	SCMS started its journey in 2004 and what followed was a path of discovery, excitement and activities that has taken us one step ahead in our continuous quest for perfection. Devoted to excellence in teaching, learning and research at an early stage, we develop students into not only leaders but individuals with a strong vision to make an impact globally!	Kritica Bajaj	f	no
URBAN	Research	Symbiosis Centre for Management Studies (SCMS) Pune	https://www.scmspune.ac.in/	SCMS started its journey in 2004 and what followed was a path of discovery, excitement and activities that has taken us one step ahead in our continuous quest for perfection. Devoted to excellence in teaching, learning and research at an early stage, we develop students into not only leaders but individuals with a strong vision to make an impact globally!	P. Nikhil	f	no
URBAN	Research	Symbiosis Centre for Management Studies (SCMS) Pune	https://www.scmspune.ac.in/	SCMS started its journey in 2004 and what followed was a path of discovery, excitement and activities that has taken us one step ahead in our continuous quest for perfection. Devoted to excellence in teaching, learning and research at an early stage, we develop students into not only leaders but individuals with a strong vision to make an impact globally!	Yogesh Pisolkar	m	no
WATER, FOOD	Government	Water and Land Management Institute (WALMI)	http://www.walmi.org	Part of Ministry of Soil and Water Conservation that aims to provide training, research and consultancy to farmers and irrigation agencies	Pradeep Purandare	m	Expert, Modelling
WATER	Government	Water Resource Department (WRD) Maharashtra	https://wrd.maharashtra.gov.in/	The Water Resources Department (formerly known as Irrigation Department); ne of the key institutional reform initiatives of the state is reconstructing of the existing Irrigation Development Corporation’s into River Basin Agency’s with a view to strengthen the states capacity in multi sector planning and management of water resources at river basin level.	Hiralal Mendhegiri	m	Expert
WATER	NGO	Watershed Organisation Trust (WOTR)	https://www.wotr.org/	Watershed Organisation Trust (WOTR) is a globally recognized organization dedicated to transforming the lives of millions across India in participatory watershed development and eco-systems restoration, adaptive sustainable agriculture, integrated and efficient water management, and climate change adaptation, with a special emphasis on vulnerable communities, farmers, and women.	Marcella D’Souza	f	Expert, Modelling
n/a	n/a	n/a	n/a	n/a	Smita Mhetre	f	no
n/a	n/a	n/a	n/a	n/a	Smitha Naik	f	no
